# Supplementary material for: SNP of Aromatase Predict Long-term Survival and Aromatase Inhibitor Toxicity in Patients with Early Breast Cancer: A Biomarker Analysis of the GIM4 and GIM5 Trials
Source: PubMed Central journal article supplement — Clin Cancer Res. 2023 Oct 27;29(24):5217–26. doi: 10.1158/1078-0432.CCR-23-1568 (PMC10722129; doi:10.1158/1078-0432.ccr-23-1568), 2023-10-27
Supplement: ccr-23-1568_supplementary_figure_s2_suppfs2.pdf [file ccr-23-1568_supplementary_figure_s2_suppfs2.pdf]

**Figure S2.** Linkage disequilibrium plot (a) and haplotypes frequencies (b) of the four analyzed SNPs of CYP19 in the Caucasian population

**a**

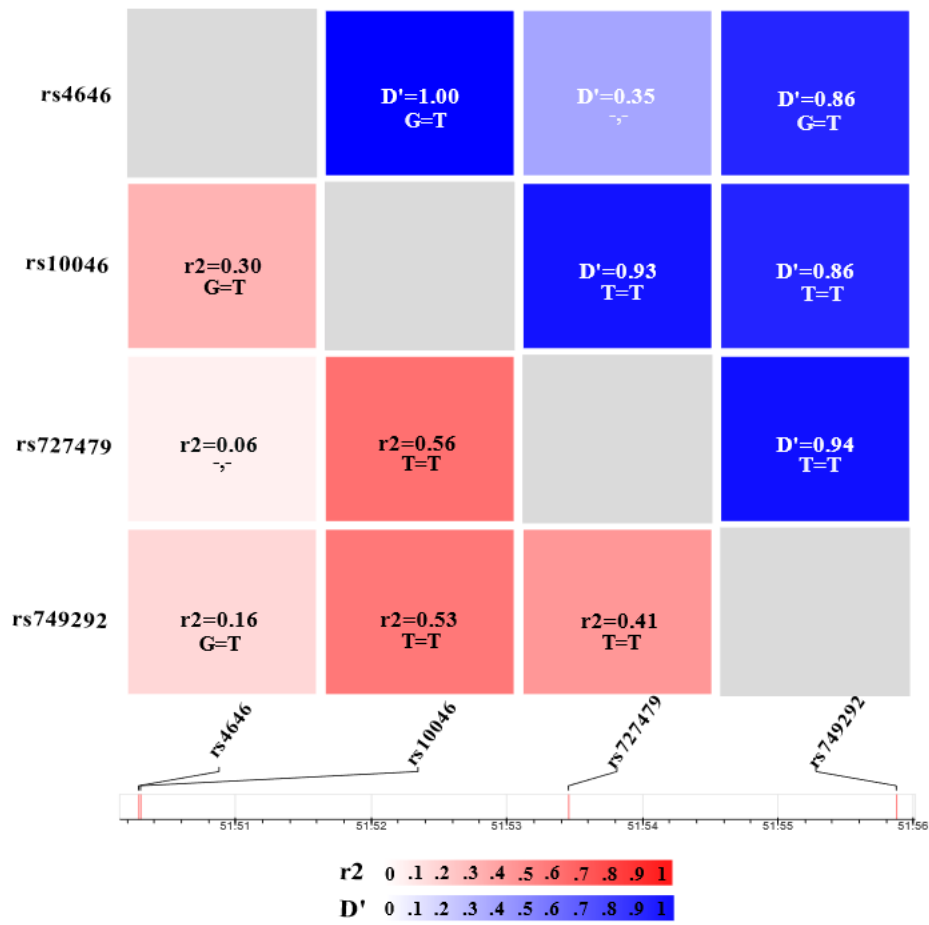

**b**

| SNPs ID             | Position (GRCh37) | Haplotypes                              |
|---------------------|-------------------|-----------------------------------------|
| rs4646              | chr15:51502844    | G G T G T G G                           |
| rs10046             | chr15:51502986    | T C C T C C T                           |
| rs727479            | chr15:51534547    | T G G T T T G                           |
| rs749292            | chr15:51558731    | T C C C C C C                           |
|                     |                   | Others                                  |
| Haplotype frequency |                   | 0.39 0.20 0.19 0.09 0.09 0.02 0.00 0.02 |
