# Supplementary material for: SNP of Aromatase Predict Long-term Survival and Aromatase Inhibitor Toxicity in Patients with Early Breast Cancer: A Biomarker Analysis of the GIM4 and GIM5 Trials
Source: PubMed Central journal article supplement — Clin Cancer Res. 2023 Oct 27;29(24):5217–26. doi: 10.1158/1078-0432.CCR-23-1568 (PMC10722129; doi:10.1158/1078-0432.ccr-23-1568), 2023-10-27
Supplement: ccr-23-1568_supplementary_figure_s4_suppfs4.pdf [file ccr-23-1568_supplementary_figure_s4_suppfs4.pdf]

**Figure S4.** Cumulative incidence of breast cancer metastasis and breast death in the GIM4 trial (a) and GIM5 study (b).

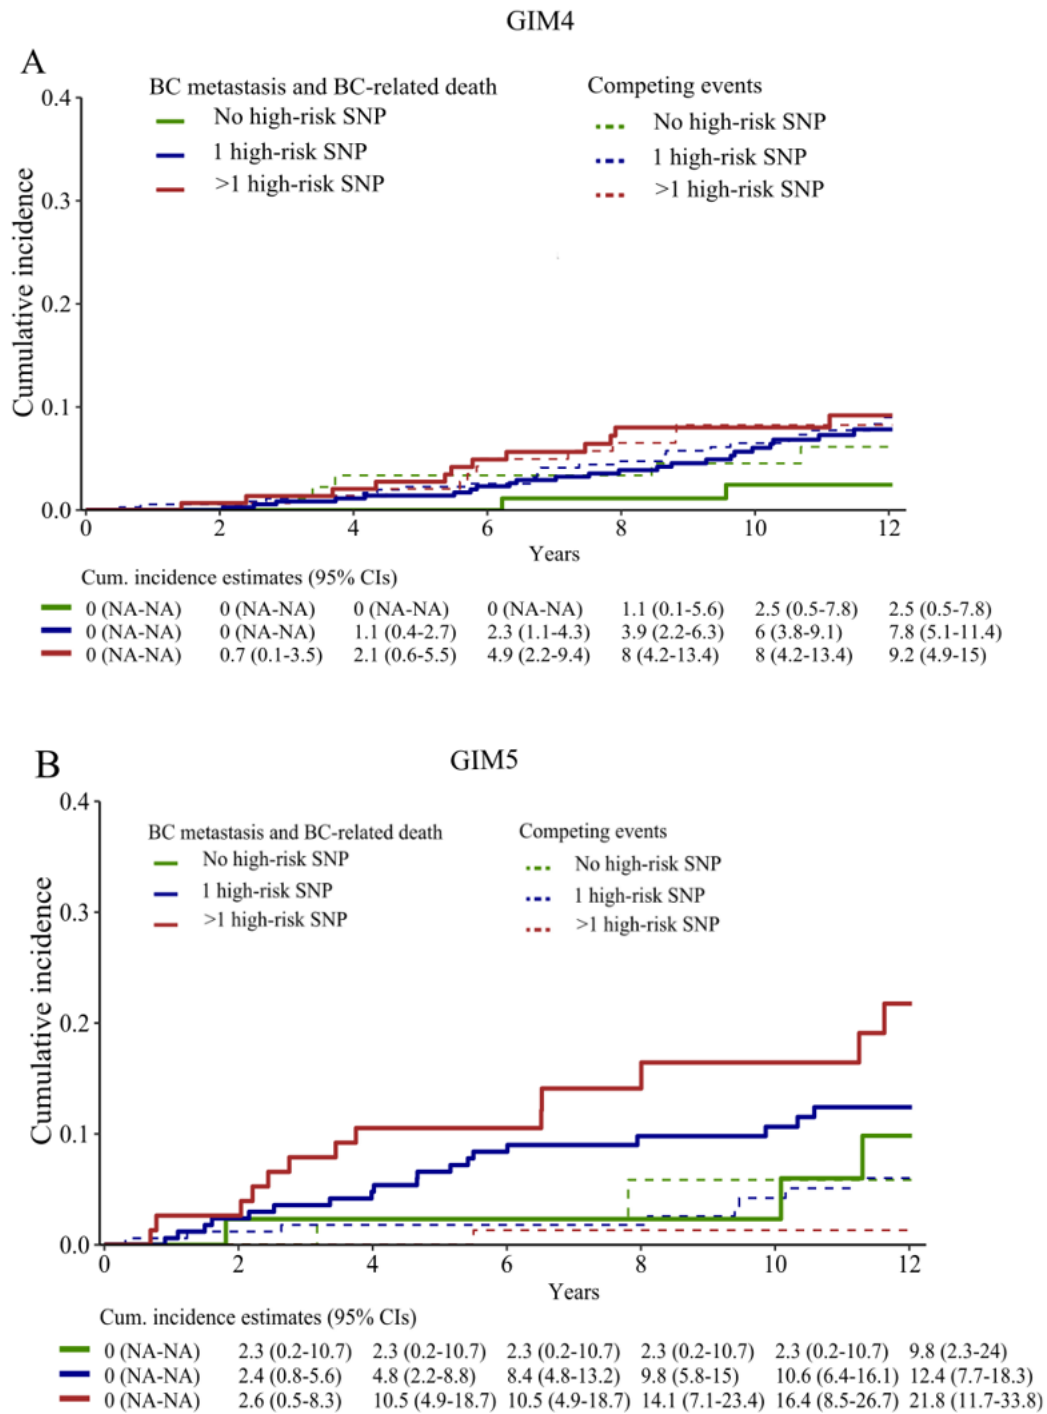

Abbreviations. BC, breast cancer
