# Supplementary material for: SNP of Aromatase Predict Long-term Survival and Aromatase Inhibitor Toxicity in Patients with Early Breast Cancer: A Biomarker Analysis of the GIM4 and GIM5 Trials
Source: PubMed Central journal article supplement — Clin Cancer Res. 2023 Oct 27;29(24):5217–26. doi: 10.1158/1078-0432.CCR-23-1568 (PMC10722129; doi:10.1158/1078-0432.ccr-23-1568), 2023-10-27
Supplement: ccr-23-1568_supplementary_table_s2_suppts2.pdf [file ccr-23-1568_supplementary_table_s2_suppts2.pdf]

**Table S2. Patients' characteristics in the GIM4 main cohort and in the GIM4-SNPs cohort.**

|                                           | <b>GIM4 Main<br/>N=2,056 (%)</b> | <b>GIM4 SNPs<br/>N=591 (%)</b> |
|-------------------------------------------|----------------------------------|--------------------------------|
| <b>Age (median, IQR)</b>                  | 61 (54-67)                       | 60 (54-67)                     |
| <b>Ever smoker</b>                        | 473 (23.0)                       | 123 (20.8)                     |
| <b>BMI (kg/m<sup>2</sup>)</b>             |                                  |                                |
| <24                                       | 656 (31.9)                       | 198 (33.5)                     |
| ≥24                                       | 1,335 (64.9)                     | 373 (63.1)                     |
| Missing                                   | 65 (3.2)                         | 20 (3.4)                       |
| <b>Tumor size</b>                         |                                  |                                |
| pT1                                       | 1407 (68.4)                      | 407 (68.9)                     |
| pT2                                       | 513 (25.0)                       | 149 (25.2)                     |
| pT3-4                                     | 77 (3.7)                         | 24 (4.1)                       |
| Missing                                   | 59 (2.9)                         | 11 (2.0)                       |
| <b>Nodal status</b>                       |                                  |                                |
| pN0                                       | 1,149 (55.9)                     | 357 (60.4)                     |
| pN1-3                                     | 839 (40.8)                       | 223 (37.7)                     |
| Missing                                   | 68 (3.3)                         | 11 (1.9)                       |
| <b>Tumor Grade</b>                        |                                  |                                |
| G1                                        | 317 (15.4)                       | 118 (20.0)                     |
| G2                                        | 1,152 (56.0)                     | 307 (51.9)                     |
| G3                                        | 430 (20.9)                       | 121 (20.5)                     |
| Missing                                   | 64 (0.0)                         | 45 (7.6)                       |
| <b>(Neo)adjuvant CT</b>                   |                                  |                                |
| No                                        | 905 (44.0)                       | 273 (46.2)                     |
| Yes                                       | 1,122 (54.6)                     | 316 (53.5)                     |
| Missing                                   | 29 (1.4)                         | 2 (0.3)                        |
| <b>HER2 status</b>                        |                                  |                                |
| Negative                                  | 1,684 (81.9)                     | 378 (64.0)                     |
| Positive                                  | 123 (6.0)                        | 18 (3.0)                       |
| Unknown                                   | 249 (12.1)                       | 195 (33.0)                     |
| <b>Tamoxifen, years<br/>(median, IQR)</b> | 2.5 (2.2-2.9)                    | 2.4 (2.1-2.6)                  |
| <b>Letrozole, years<br/>(median, IQR)</b> | 2.9 (2.0-5.0)                    | 3.0 (2.1-5.0)                  |
| <b>Treatment arm</b>                      |                                  |                                |
| Short                                     | 1,030 (50.1)                     | 292 (49.4)                     |
| Long                                      | 1,026 (49.9)                     | 299 (50.6)                     |
