# Supplementary material for: SNP of Aromatase Predict Long-term Survival and Aromatase Inhibitor Toxicity in Patients with Early Breast Cancer: A Biomarker Analysis of the GIM4 and GIM5 Trials
Source: PubMed Central journal article supplement — Clin Cancer Res. 2023 Oct 27;29(24):5217–26. doi: 10.1158/1078-0432.CCR-23-1568 (PMC10722129; doi:10.1158/1078-0432.ccr-23-1568), 2023-10-27
Supplement: ccr-23-1568_supplementary_table_s3_suppts3.pdf [file ccr-23-1568_supplementary_table_s3_suppts3.pdf]

**Table S3. Patients' characteristics in the GIM5 main cohort and in the GIM5-SNPs cohort.**

|                                           | <b>GIM5<br/>N=488, (%)</b> | <b>GIM5-SNPs<br/>N=295, (%)</b> |
|-------------------------------------------|----------------------------|---------------------------------|
| <b>Age (median, IQR)</b>                  | 61 (55-68)                 | 61 (55-69)                      |
| <b>Ever smoker</b>                        | 70 (14.3)                  | 48 (16.3)                       |
| <b>BMI (kg/m<sup>2</sup>)</b>             |                            |                                 |
| <24                                       | 142 (29.1)                 | 89 (30.2)                       |
| ≥24                                       | 346 (70.9)                 | 205 (69.5)                      |
| Missing                                   | 0 (0)                      | 1 (0.3)                         |
| <b>Tumor size</b>                         |                            |                                 |
| pT1                                       | 253 (51.8)                 | 147 (49.8)                      |
| pT2                                       | 169 (34.6)                 | 114 (38.6)                      |
| pT3-4                                     | 37 (7.6)                   | 26 (8.8)                        |
| Missing                                   | 29 (5.9)                   | 8 (2.7)                         |
| <b>Nodal status</b>                       |                            |                                 |
| pN0                                       | 131(26.8)                  | 78 (26.4)                       |
| pN1-3                                     | 335 (68.6)                 | 217 (73.6)                      |
| Missing                                   | 22 (4.5)                   | 0 (0)                           |
| <b>Tumor Grade</b>                        |                            |                                 |
| G1                                        | 47 (9.6)                   | 35 (11.9)                       |
| G2                                        | 250 (51.2)                 | 159 (54.0)                      |
| G3                                        | 132 (27.0)                 | 88 (29.8)                       |
| Missing                                   | 59 (12.1)                  | 13 (4.4)                        |
| <b>(Neo)adjuvant CT</b>                   |                            |                                 |
| No                                        | 77 (15.8)                  | 31 (10.5)                       |
| Yes                                       | 411 (84.2)                 | 264 (89.5)                      |
| Missing                                   | 0 (0)                      | 0 (0)                           |
| <b>HER2 status</b>                        |                            |                                 |
| Negative                                  | 284 (58.2)                 | 279 (94.6)                      |
| Positive                                  | 31 (6.4)                   | 16 (5.4)                        |
| Unknown                                   | 173 (35.5)                 | 0 (0)                           |
| <b>Tamoxifen, years<br/>(median, IQR)</b> | 5.2 (4.9-5.4)              | 5.1 (4.9-5.3)                   |
| <b>Letrozole, years<br/>(median, IQR)</b> | 4.5 (1.3-5.0)              | 4.7 (1.4-5.0)                   |
