# Supplementary material for: SNP of Aromatase Predict Long-term Survival and Aromatase Inhibitor Toxicity in Patients with Early Breast Cancer: A Biomarker Analysis of the GIM4 and GIM5 Trials
Source: PubMed Central journal article supplement — Clin Cancer Res. 2023 Oct 27;29(24):5217–26. doi: 10.1158/1078-0432.CCR-23-1568 (PMC10722129; doi:10.1158/1078-0432.ccr-23-1568), 2023-10-27
Supplement: ccr-23-1568_supplementary_table_s4_suppts4.pdf [file ccr-23-1568_supplementary_table_s4_suppts4.pdf]

**Table S4. Rs4646 genotypes distribution according to patients' baseline characteristics**

|                                           | <b>rs4646</b>       |                     |                    |                                        |                                   |
|-------------------------------------------|---------------------|---------------------|--------------------|----------------------------------------|-----------------------------------|
|                                           | <b>GG<br/>N=451</b> | <b>GT<br/>N=373</b> | <b>TT<br/>N=62</b> | <b><math>\chi^2</math><br/>p value</b> | <b>Kruskal-Wallis<br/>p value</b> |
| <b>BMI, N (%)</b>                         |                     |                     |                    |                                        |                                   |
| <24                                       | 156 (34.6)          | 253 (67.8)          | 19 (30.6)          | 0.366                                  |                                   |
| ≥24                                       | 285 (63.2)          | 112 (30.0)          | 40 (64.5)          |                                        |                                   |
| Missing                                   | 10 (2.2)            | 8 (2.1)             | 3 (4.8)            |                                        |                                   |
| <b>Tumor size, N (%)</b>                  |                     |                     |                    |                                        |                                   |
| pT1                                       | 282 (62.5)          | 229 (61.4)          | 43 (69.4)          | 0.07                                   |                                   |
| pT2                                       | 135 (29.9)          | 119 (31.9)          | 9 (14.5)           |                                        |                                   |
| pT3-4                                     | 27 (6.0)            | 17 (4.6)            | 6 (9.7)            |                                        |                                   |
| Missing                                   | 7 (1.6)             | 8 (2.1)             | 4 (6.5)            |                                        |                                   |
| <b>Nodal Status, N (%)</b>                |                     |                     |                    |                                        |                                   |
| pN0                                       | 216 (48.0)          | 183 (49.1)          | 36 (58.1)          | 0.373                                  |                                   |
| pN1-3                                     | 219 (51.0)          | 185 (49.6)          | 26 (41.9)          |                                        |                                   |
| Missing                                   | 6 (1.0)             | 5 (1.3)             | 0 (0.0)            |                                        |                                   |
| <b>Grade, N (%)</b>                       |                     |                     |                    |                                        |                                   |
| G1                                        | 72 (16.0)           | 67 (18.0)           | 11 (17.7)          | 0.716                                  |                                   |
| G2                                        | 249 (55.2)          | 186 (49.9)          | 31 (50.0)          |                                        |                                   |
| G3                                        | 103 (22.8)          | 93 (24.9)           | 13 (21.0)          |                                        |                                   |
| Missing                                   | 27 (6.0)            | 27 (7.2)            | 7 (11.3)           |                                        |                                   |
| <b>Tamoxifen, years<br/>(median, IQR)</b> | 2.1 (1.9-2.5)       | 2.1 (1.9-2.5)       | 2.1 (1.6-2.8)      |                                        | 0.474                             |
| <b>Letrozole, years<br/>(median, IQR)</b> | 3.2 (2.8-5.0)       | 3.1 (2.4-5.0)       | 3.0 (2.6-5.0)      |                                        | 0.431                             |
