# Supplementary material for: SNP of Aromatase Predict Long-term Survival and Aromatase Inhibitor Toxicity in Patients with Early Breast Cancer: A Biomarker Analysis of the GIM4 and GIM5 Trials
Source: PubMed Central journal article supplement — Clin Cancer Res. 2023 Oct 27;29(24):5217–26. doi: 10.1158/1078-0432.CCR-23-1568 (PMC10722129; doi:10.1158/1078-0432.ccr-23-1568), 2023-10-27
Supplement: ccr-23-1568_supplementary_table_s5_suppts5.pdf [file ccr-23-1568_supplementary_table_s5_suppts5.pdf]

**Table S5. R10046 genotypes distribution according to patients' baseline characteristics**

|                                           | <b>rs10046</b>     |                    |                    | $\chi^2$<br>p value | Kruskal-Wallis<br>p value |
|-------------------------------------------|--------------------|--------------------|--------------------|---------------------|---------------------------|
|                                           | <b>CC</b><br>N=229 | <b>GT</b><br>N=450 | <b>TT</b><br>N=207 |                     |                           |
| <b>BMI, N (%)</b>                         |                    |                    |                    |                     |                           |
| <24                                       | 77 (33.6)          | 135 (30)           | 75 (36.2)          | 0.208               |                           |
| ≥24                                       | 147 (64.2)         | 306 (68.0)         | 125 (60.8)         |                     |                           |
| Missing                                   | 5 (2.2)            | 9 (2.0)            | 7 (3.4)            |                     |                           |
| <b>Tumor size, N (%)</b>                  |                    |                    |                    |                     |                           |
| pT1                                       | 139 (60.7)         | 289 (64.2)         | 126 (60.9)         | 0.715               |                           |
| pT2                                       | 72 (31.4)          | 125 (27.8)         | 66 (31.9)          |                     |                           |
| pT3-4                                     | 11 (4.8)           | 28 (6.2)           | 11 (5.3)           |                     |                           |
| Missing                                   | 7 (3.1)            | 8 (1.8)            | 4 (1.9)            |                     |                           |
| <b>Nodal Status, N (%)</b>                |                    |                    |                    |                     |                           |
| pN0                                       | 110 (48.0)         | 228 (50.7)         | 97 (46.9)          | 0.603               |                           |
| pN1-3                                     | 117 (51.1)         | 216 (48.0)         | 107 (51.7)         |                     |                           |
| Missing                                   | 2 (0.8)            | 6 (1.1)            | 3 (1.4)            |                     |                           |
| <b>Grade, N (%)</b>                       |                    |                    |                    |                     |                           |
| G1                                        | 37 (16.2)          | 86 (19.1)          | 27 (13.0)          | 0.315               |                           |
| G2                                        | 116 (50.7)         | 229 (50.9)         | 121 (58.5)         |                     |                           |
| G3                                        | 55 (24.0)          | 106 (23.6)         | 48 (23.2)          |                     |                           |
| Missing                                   | 21 (9.2)           | 29 (6.4)           | 11 (5.3)           |                     |                           |
| <b>Tamoxifen, years<br/>(median, IQR)</b> | 2.1 (2.0-2.6)      | 2.2 (1.8-2.5)      | 2.1 (2.3-2.8)      |                     | 0.815                     |
| <b>Letrozole, years<br/>(median, IQR)</b> | 3.0 (2.1-5.0)      | 3.2 (2.-5.0)       | 3.1 (2.2-5.0)      |                     | 0.570                     |
