# Supplementary material for: SNP of Aromatase Predict Long-term Survival and Aromatase Inhibitor Toxicity in Patients with Early Breast Cancer: A Biomarker Analysis of the GIM4 and GIM5 Trials
Source: PubMed Central journal article supplement — Clin Cancer Res. 2023 Oct 27;29(24):5217–26. doi: 10.1158/1078-0432.CCR-23-1568 (PMC10722129; doi:10.1158/1078-0432.ccr-23-1568), 2023-10-27
Supplement: ccr-23-1568_supplementary_table_s6_suppts6.pdf [file ccr-23-1568_supplementary_table_s6_suppts6.pdf]

**Table S6. Rs749292 genotypes distribution according to patients' baseline characteristics**

|                                           | <b>rs749292</b>     |                     |                     |                                        |                                   |
|-------------------------------------------|---------------------|---------------------|---------------------|----------------------------------------|-----------------------------------|
|                                           | <b>CC<br/>N=300</b> | <b>CT<br/>N=435</b> | <b>TT<br/>N=151</b> | <b><math>\chi^2</math><br/>p value</b> | <b>Kruskal-Wallis<br/>p value</b> |
| <b>BMI, N (%)</b>                         |                     |                     |                     |                                        |                                   |
| <24                                       | 104 (34.7)          | 129 (29.7)          | 57 (37.7)           | 0.145                                  |                                   |
| ≥24                                       | 194 (64.7)          | 295 (67.8)          | 89 (58.9)           |                                        |                                   |
| Missing                                   | 5 (1.7)             | 11 (2.5)            | 7 (4.6)             |                                        |                                   |
| <b>Tumor size, N (%)</b>                  |                     |                     |                     |                                        |                                   |
| pT1                                       | 189 (63.0)          | 272 (62.5)          | 93 (61.6)           | 0.756                                  |                                   |
| pT2                                       | 89 (29.7)           | 127 (29.2)          | 47 (31.1)           |                                        |                                   |
| pT3-4                                     | 13 (4.3)            | 29 (6.7)            | 8 (5.3)             |                                        |                                   |
| Missing                                   | 9 (3.0)             | 7 (1.6)             | 3 (2.0)             |                                        |                                   |
| <b>Nodal Status, N (%)</b>                |                     |                     |                     |                                        |                                   |
| pN0                                       | 159 (53)            | 208 (47.8)          | 68 (45.0)           | 0.236                                  |                                   |
| pN1-3                                     | 138 (46)            | 222 (51.0)          | 80 (53.0)           |                                        |                                   |
| Missing                                   | 3 (1.0)             | 5 (1.1)             | 3 (2.0)             |                                        |                                   |
| <b>Grade, N (%)</b>                       |                     |                     |                     |                                        |                                   |
| G1                                        | 49 (16.3)           | 72 (16.6)           | 29 (19.2)           | 0.657                                  |                                   |
| G2                                        | 149 (49.7)          | 232 (53.3)          | 85 (56.3)           |                                        |                                   |
| G3                                        | 25 (8.3)            | 101 (23.2)          | 31 (20.5)           |                                        |                                   |
| Missing                                   |                     | 30 (6.9)            | 6 (4.0)             |                                        |                                   |
| <b>Tamoxifen, years<br/>(median, IQR)</b> | 2.1 (2.0-2.5)       | 2.1 (1.9-2.6)       | 2.1 (2.0-2.5)       |                                        | 0.782                             |
| <b>Letrozole, years<br/>(median, IQR)</b> | 3.0 (2.3-5.0)       | 3.3 (2.3-5.0)       | 3.4 (2.4-5.0)       |                                        | 0.323                             |
