# Supplementary material for: SNP of Aromatase Predict Long-term Survival and Aromatase Inhibitor Toxicity in Patients with Early Breast Cancer: A Biomarker Analysis of the GIM4 and GIM5 Trials
Source: PubMed Central journal article supplement — Clin Cancer Res. 2023 Oct 27;29(24):5217–26. doi: 10.1158/1078-0432.CCR-23-1568 (PMC10722129; doi:10.1158/1078-0432.ccr-23-1568), 2023-10-27
Supplement: ccr-23-1568_supplementary_table_s7_suppts7.pdf [file ccr-23-1568_supplementary_table_s7_suppts7.pdf]

**Table S7. Rs727479 genotypes distribution according to patients' baseline characteristics**

|                                           | <b>rs727479</b>     |                     |                     |                                        |                                   |
|-------------------------------------------|---------------------|---------------------|---------------------|----------------------------------------|-----------------------------------|
|                                           | <b>GG<br/>N=133</b> | <b>TG<br/>N=435</b> | <b>TT<br/>N=151</b> | <b><math>\chi^2</math><br/>p value</b> | <b>Kruskal-Wallis<br/>p value</b> |
| <b>BMI, N (%)</b>                         |                     |                     |                     |                                        |                                   |
| <24                                       | 48 (36.1)           | 140 (31.7)          | 99 (31.8)           | 0.571                                  |                                   |
| ≥24                                       | 81 (60.9)           | 293 (66.3)          | 204 (65.6)          |                                        |                                   |
| Missing                                   | 4 (3.0)             | 9 (2.0)             | 8 (2.6)             |                                        |                                   |
| <b>Tumor size, N (%)</b>                  |                     |                     |                     |                                        |                                   |
| pT1                                       | 77 (57.9)           | 291 (65.8)          | 186 (59.8)          | 0.340                                  |                                   |
| pT2                                       | 44 (33.1)           | 120 (27.1)          | 99 (31.8)           |                                        |                                   |
| pT3-4                                     | 7 (5.3)             | 23 (5.2)            | 20 (6.4)            |                                        |                                   |
| Missing                                   | 5 (3.8)             | 8 (1.8)             | 6 (1.9)             |                                        |                                   |
| <b>Nodal Status, N (%)</b>                |                     |                     |                     |                                        |                                   |
| pN0                                       | 65 (48.9)           | 221 (50.0)          | 149 (47.9)          | 0.840                                  |                                   |
| pN1-3                                     | 67 (50.4)           | 215 (48.6)          | 158 (50.8)          |                                        |                                   |
| Missing                                   | 1 (0.8)             | 6 (13.6)            | 4 (1.3)             |                                        |                                   |
| <b>Grade, N (%)</b>                       |                     |                     |                     |                                        |                                   |
| G1                                        | 21 (15.8)           | 83 (18.8)           | 46 (14.8)           | 0.598                                  |                                   |
| G2                                        | 68 (51.1)           | 224 (50.7)          | 174 (55.9)          |                                        |                                   |
| G3                                        | 29 (21.8)           | 107 (24.2)          | 73 (23.5)           |                                        |                                   |
| Missing                                   | 15 (11.3)           | 28 (6.3)            | 18 (5.9)            |                                        |                                   |
| <b>Tamoxifen, years<br/>(median, IQR)</b> | 2.1 (2.0-2.6)       | 2.1 (1.8-2.5)       | 2.3 (2.1-2.6)       |                                        | 0.915                             |
| <b>Letrozole, years<br/>(median, IQR)</b> | 3.1 (2.0-5.0)       | 3.4 (2.5-5.0)       | 3.0 (2.2-5.0)       |                                        | 0.100                             |
