# Supplementary material for: SNP of Aromatase Predict Long-term Survival and Aromatase Inhibitor Toxicity in Patients with Early Breast Cancer: A Biomarker Analysis of the GIM4 and GIM5 Trials
Source: PubMed Central journal article supplement — Clin Cancer Res. 2023 Oct 27;29(24):5217–26. doi: 10.1158/1078-0432.CCR-23-1568 (PMC10722129; doi:10.1158/1078-0432.ccr-23-1568), 2023-10-27
Supplement: ccr-23-1568_supplementary_table_s8_suppts8.pdf [file ccr-23-1568_supplementary_table_s8_suppts8.pdf]

**Table S8. Association between SNPs of aromatase and Disease-free survival, Overall survival and Cumulative incidence of BC metastasis and BC death. Association with DFS and OS is shown on the basis of a univariate Cox proportional hazard model, association with Cumulative incidence of BC metastasis and BC death is shown on the basis of a univariate competing risk model.**

|                          | DFS<br>Events=159 |         | OS<br>Events= 100       |              | BC metastasis, BC death<br>Events= 75 |              |
|--------------------------|-------------------|---------|-------------------------|--------------|---------------------------------------|--------------|
|                          | HR (95% CIs)      | p value | HR (95% CIs)            | p value      | sHR (95% CIs)                         | p value      |
| <b>rs4646 (G&gt;T)</b>   |                   |         |                         |              |                                       |              |
| <b>Additive</b>          |                   |         |                         |              |                                       |              |
| G/T                      | 1.15 (0.83-1.58)  | 0.394   | 1.09 (0.72-1.65)        | 0.695        | 1.02 (0.64-1.52)                      | 0.938        |
| T/T                      | 0.84 (0.42-1.67)  | 0.615   | 0.56 (0.20-1.54)        | 0.310        | 0.32 (0.16-1.49)                      | 0.139        |
| <b>Dominant</b>          |                   |         |                         |              |                                       |              |
| G/T+T/T                  | 1.10 (0.81-1.51)  | 0.182   | 1.05 (0.71-1.56)        | 0.477        | 1.62 (0.85-3.08)                      | 0.144        |
| <b>Recessive</b>         |                   |         |                         |              |                                       |              |
| T/T                      | 0.79 (0.40-1.54)  | 0.482   | 0.52 (0.19-1.43)        | 0.267        | 0.83 (0.30-2.29)                      | 0.131        |
| <b>rs10046 (C&gt;T)</b>  |                   |         |                         |              |                                       |              |
| <b>Additive</b>          |                   |         |                         |              |                                       |              |
| C/T                      | 1.12 (0.81-2.01)  | 0.562   | 1.64 (0.93-2.89)        | 0.090        | 1.47 (0.79-2.70)                      | 0.222        |
| T/T                      | 1.29 (0.83-2.01)  | 0.259   | <b>2.12 (1.14-3.93)</b> | <b>0.017</b> | <b>2.03 (1.04-3.94)</b>               | <b>0.373</b> |
| <b>Dominant</b>          |                   |         |                         |              |                                       |              |
| C/T + T/T                | 1.18 (0.82-1.70)  | 0.381   | <b>1.83 (1.09-3.09)</b> | <b>0.034</b> | 1.61 (0.89-2.91)                      | 0.095        |
| <b>Recessive</b>         |                   |         |                         |              |                                       |              |
| T/T                      | 1.22 (0.85-1.73)  | 0.288   | 1.51 (0.97-2.39)        | 0.070        | 1.57 (0.96-2.57)                      | 0.071        |
| <b>rs749292 (C&gt;T)</b> |                   |         |                         |              |                                       |              |
| <b>Additive</b>          |                   |         |                         |              |                                       |              |
| C/T                      | 1.14 (0.80-1.63)  | 0.478   | 1.20 (0.74-1.95)        | 0.460        | 1.26 (0.73-2.18)                      | 0.407        |
| T/T                      | 1.45 (0.92-2.46)  | 0.108   | <b>1.83 (1.03-3.26)</b> | <b>0.040</b> | <b>2.11 (1.12-3.94)</b>               | <b>0.020</b> |
| <b>Dominant</b>          |                   |         |                         |              |                                       |              |
| C/T + T/T                | 1.21 (0.86-1.70)  | 0.268   | 1.42 (0.91-2.21)        | 0.198        | 1.46 (0.88-2.44)                      | 0.145        |
| <b>Recessive</b>         |                   |         |                         |              |                                       |              |
| T/T                      | 1.34 (0.90-1.99)  | 0.145   | <b>1.64 (1.04-2.67)</b> | <b>0.050</b> | <b>1.83 (1.09-3.08)</b>               | <b>0.023</b> |
| <b>rs727479 (T&gt;G)</b> |                   |         |                         |              |                                       |              |
| <b>Additive</b>          |                   |         |                         |              |                                       |              |
| G/T                      | 1.07 (0.67-1.73)  | 0.770   | 1.97 (0.89-4.37)        | 0.095        | 1.94 (0.82-1.25)                      | 0.134        |
| T/T                      | 1.30 (0.80-2.11)  | 0.298   | <b>2.67 (1.19-5.95)</b> | <b>0.017</b> | <b>2.48 (1.04-5.95)</b>               | <b>0.040</b> |
| <b>Dominant</b>          |                   |         |                         |              |                                       |              |
| G/T + T/T                | 1.16 (0.74-1.82)  | 0.513   | <b>2.62 (1.17-5.83)</b> | <b>0.040</b> | <b>2.16 (0.99-4.97)</b>               | <b>0.051</b> |
| <b>Recessive</b>         |                   |         |                         |              |                                       |              |
| T/T                      | 1.23 (0.89-1.68)  | 0.210   | 1.53 (1.01-2.31)        | 0.044        | 0.46 (0.20-1.05)                      | 0.071        |
