# Supplementary material for: SNP of Aromatase Predict Long-term Survival and Aromatase Inhibitor Toxicity in Patients with Early Breast Cancer: A Biomarker Analysis of the GIM4 and GIM5 Trials
Source: PubMed Central journal article supplement — Clin Cancer Res. 2023 Oct 27;29(24):5217–26. doi: 10.1158/1078-0432.CCR-23-1568 (PMC10722129; doi:10.1158/1078-0432.ccr-23-1568), 2023-10-27
Supplement: ccr-23-1568_supplementary_table_s10_suppts10.pdf [file ccr-23-1568_supplementary_table_s10_suppts10.pdf]

**Table S10. Baseline patients' characteristics across SNPs-based prognostic groups**

|                                           | <b>No high-risk SNPs<br/>N=133 (15%)</b> | <b>1 high-risk SNP<br/>N=530 (60%)</b> | <b>&gt;1 high-risk SNPs<br/>N=223 (25%)</b> | <b>p value</b> |
|-------------------------------------------|------------------------------------------|----------------------------------------|---------------------------------------------|----------------|
| <b>Age (median, IQR)</b>                  | 57 (53-64)                               | 61(54-67)                              | 61 (55-68)                                  | 0.002          |
| <b>Ever smoker</b>                        | 29 (21.8)                                | 107 (20.2)                             | 35 (15.7)                                   | 0.264          |
| <b>BMI (kg/m<sup>2</sup>)</b>             |                                          |                                        |                                             |                |
| <24                                       | 48 (26.1)                                | 155 (29.2)                             | 84 (37.7)                                   | 0.034          |
| ≥24                                       | 81 (60.9)                                | 365 (68.9)                             | 132 (59.1)                                  |                |
| Missing                                   | 4 (<1)                                   | 10 (<1)                                | 7 (<1)                                      |                |
| <b>Tumor size</b>                         |                                          |                                        |                                             |                |
| pT1                                       | 77 (57.9)                                | 343 (64.7)                             | 134 (60.1)                                  | 0.523          |
| pT2                                       | 44 (33.0)                                | 146 (27.5)                             | 73 (32.8)                                   |                |
| pT3-4                                     | 7 (<1)                                   | 31 (5.8)                               | 12 (<1)                                     |                |
| Missing                                   | 5 (<1)                                   | 10 (<1)                                | 4 (<1)                                      |                |
| <b>Nodal status</b>                       |                                          |                                        |                                             |                |
| pN0                                       | 65 (48.9)                                | 266 (50.2)                             | 104 (46.6)                                  | 0.713          |
| pN1-3                                     | 67 (50.4)                                | 258 (48.7)                             | 115 (51.7)                                  |                |
| Missing                                   | 1 (<1)                                   | 6 (<1)                                 | 4 (<1)                                      |                |
| <b>Tumor Grade</b>                        |                                          |                                        |                                             |                |
| G1                                        | 21 (15.8)                                | 96 (18.1)                              | 33 (14.8)                                   | 0.467          |
| G2                                        | 68 (51.1)                                | 268 (50.6)                             | 130 (58.3)                                  |                |
| G3                                        | 29 (21.8)                                | 132 (24.9)                             | 48 (21.5)                                   |                |
| Missing                                   | 15 (11.3)                                | 34 (<1)                                | 12 (<1)                                     |                |
| <b>(Neo)adjuvant CT</b>                   |                                          |                                        |                                             |                |
| No                                        | 42 (31.6)                                | 190 (35.8)                             | 72 (32.3)                                   | 0.525          |
| Yes                                       | 91 (68.4)                                | 340 (64.2)                             | 149 (66.8)                                  |                |
| Missing                                   | 0                                        | 0                                      | 2 (<1)                                      |                |
| <b>Tamoxifen, years<br/>(median, IQR)</b> | 2.8 (2.2-4.7)                            | 2.7 (2.2-4.9)                          | 2.6 (2.2-4.9)                               | 0.976          |
| <b>Letrozole, years<br/>(median, IQR)</b> | 3.1 (2.0-5.0)                            | 3.2 (2.4-5.0)                          | 3.2 (2.3-5.0)                               | 0.296          |
