# Supplementary material for: SNP of Aromatase Predict Long-term Survival and Aromatase Inhibitor Toxicity in Patients with Early Breast Cancer: A Biomarker Analysis of the GIM4 and GIM5 Trials
Source: PubMed Central journal article supplement — Clin Cancer Res. 2023 Oct 27;29(24):5217–26. doi: 10.1158/1078-0432.CCR-23-1568 (PMC10722129; doi:10.1158/1078-0432.ccr-23-1568), 2023-10-27
Supplement: ccr-23-1568_supplementary_table_s11_suppts11.pdf [file ccr-23-1568_supplementary_table_s11_suppts11.pdf]

**Table S11. Association between SNPs-based groups and Disease-free survival, Overall survival and Cumulative incidence of BC metastasis and BC death, calculated separately for the GIM4 and the GIM5 cohorts. Association with DFS and OS is shown on the basis of a univariate Cox proportional hazard model, association with Cumulative incidence of BC metastasis and BC death is shown on the basis of a univariate competing risk model.**

| Study                  | SNP-based groups | Univariate Cox Regression Model |       |                  |       | Univariate Fine-Gray model |       |
|------------------------|------------------|---------------------------------|-------|------------------|-------|----------------------------|-------|
|                        |                  | DFS                             |       | OS               |       | BC metastasis, BC death    |       |
|                        |                  | HR (95% CIs)                    | p     | HR (95% CIs)     | p     | sHR (95% CIs)              | p     |
| <b>GIM4</b><br>(N=591) | 0 high-risk SNP  | 1                               |       | 1                |       | 1                          |       |
|                        | 1 high-risk SNP  | 1.38 (0.72-2.64)                | 0.325 | 1.68 (0.59-4.82) | 0.334 | 3.23 (0.76-13.7)           | 0.111 |
|                        | >1 high-risk SNP | 1.48 (0.72-3.04)                | 0.284 | 2.76 (0.93-8.19) | 0.068 | 4.10 (0.92-18.3)           | 0.065 |
| <b>GIM5</b><br>(N=295) | 0 high-risk SNP  | 1                               |       | 1                |       | 1                          |       |
|                        | 1 high-risk SNP  | 0.83 (0.42-1.63)                | 0.587 | 2.46 (0.78-8.42) | 0.121 | 1.25 (0.42-3.67)           | 0.688 |
|                        | >1 high-risk SNP | 1.25 (0.60-2.59)                | 0.551 | 3.09 (0.88-18.9) | 0.079 | 2.26 (0.74-6.87)           | 0.151 |
