# Supplementary material for: SNP of Aromatase Predict Long-term Survival and Aromatase Inhibitor Toxicity in Patients with Early Breast Cancer: A Biomarker Analysis of the GIM4 and GIM5 Trials
Source: PubMed Central journal article supplement — Clin Cancer Res. 2023 Oct 27;29(24):5217–26. doi: 10.1158/1078-0432.CCR-23-1568 (PMC10722129; doi:10.1158/1078-0432.ccr-23-1568), 2023-10-27
Supplement: ccr-23-1568_supplementary_table_s12_suppts12.pdf [file ccr-23-1568_supplementary_table_s12_suppts12.pdf]

**Table S12. Association between SNPs of aromatase, cumulative incidence of skeletal events and cumulative incidence of cardiovascular events. The association is shown on the basis of a univariate competing risk model.**

|                          | Skeletal Events=79 |         | Cardiovascular Events= 19 |         |
|--------------------------|--------------------|---------|---------------------------|---------|
|                          | sHR (95% CIs)      | p value | sHR (95% CIs)             | p value |
| <b>rs4646 (G&gt;T)</b>   |                    |         |                           |         |
| <b>Additive</b>          |                    |         |                           |         |
| G/T                      | 1.78 (1.12-2.84)   | 0.015   | 1.50 (0.59-3.85)          | 0.394   |
| T/T                      | 1.51 (0.63-3.64)   | 0.354   | 0.84 (0.10-6.54)          | 0.869   |
| <b>Dominant</b>          |                    |         |                           |         |
| G/T+T/T                  | 1.57 (0.89-2.78)   | 0.117   | 2.05 (0.58-7.6)           | 0.266   |
| <b>Recessive</b>         |                    |         |                           |         |
| T/T                      | 0.79 (0.39-1.61)   | 0.512   | 0.62 (0.19-5.43)          | 0.710   |
| <b>rs10046 (C&gt;T)</b>  |                    |         |                           |         |
| <b>Additive</b>          |                    |         |                           |         |
| C/T                      | 1.03 (0.63-1.71)   | 0.896   | 1.05 (0.39-2.79)          | 0.929   |
| T/T                      | 0.49 (0.24-1.04)   | 0.063   | 0.20 (0.10-1.67)          | 0.138   |
| <b>Dominant</b>          |                    |         |                           |         |
| C/T + T/T                | 0.87 (0.53-1.41)   | 0.567   | 0.79 (0.30-2.09)          | 0.639   |
| <b>Recessive</b>         |                    |         |                           |         |
| T/T                      | 0.49 (0.25-0.97)   | 0.034   | 0.20 (0.10-1.47)          | 0.114   |
| <b>rs749292 (C&gt;T)</b> |                    |         |                           |         |
| <b>Additive</b>          |                    |         |                           |         |
| C/T                      | 0.94 (0.59-1.49)   | 0.785   | 0.50 (0.20-1.25)          | 0.138   |
| T/T                      | 0.33 (0.13-0.85)   | 0.021   | 0.74 (0.01-NA)            | 0.997   |
| <b>Dominant</b>          |                    |         |                           |         |
| C/T + T/T                | 0.79 (0.50-1.24)   | 0.297   | 0.38 (0.15-0.94)          | 0.037   |
| <b>Recessive</b>         |                    |         |                           |         |
| T/T                      | 0.34 (0.14-0.85)   | 0.020   | 0.15 (0.01-NA)            | 0.997   |
| <b>rs727479 (T&gt;G)</b> |                    |         |                           |         |
| <b>Additive</b>          |                    |         |                           |         |
| G/T                      | 0.99 (0.53-1.85)   | 0.978   | 0.70 (0.25-1.98)          | 0.508   |
| T/T                      | 0.82 (0.42-1.60)   | 0.554   | 0.18 (0.03-0.91)          | 0.038   |
| <b>Dominant</b>          |                    |         |                           |         |
| G/T + T/T                | 1.08 (0.60-1.97)   | 0.782   | 2.04 (0.73-5.66)          | 0.173   |
| <b>Recessive</b>         |                    |         |                           |         |
| T/T                      | 1.22 (0.75-1.97)   | 0.420   | 0.23 (0.05-0.99)          | 0.048   |
