# Supplementary material for: SNP of Aromatase Predict Long-term Survival and Aromatase Inhibitor Toxicity in Patients with Early Breast Cancer: A Biomarker Analysis of the GIM4 and GIM5 Trials
Source: PubMed Central journal article supplement — Clin Cancer Res. 2023 Oct 27;29(24):5217–26. doi: 10.1158/1078-0432.CCR-23-1568 (PMC10722129; doi:10.1158/1078-0432.ccr-23-1568), 2023-10-27
Supplement: ccr-23-1568_supplementary_table_s13_suppts13.pdf [file ccr-23-1568_supplementary_table_s13_suppts13.pdf]

**Table S13. Multivariable competing risk model for skeletal events versus competing events according to rs10046 and rs749292 combined genotypes and patients' baseline characteristics**

| Variable                       | Skeletal events  |         | Competing events  |         |
|--------------------------------|------------------|---------|-------------------|---------|
|                                | sHR (95% CIs)    | p value | sHR (95% CIs)     | p value |
|                                | N=886, events=79 |         | N=886, events=147 |         |
| rs10046 and rs749292 genotypes | 1                |         | 1                 |         |
| rs10046 C/C + rs749292 C/C     | 1.00 (0.60-1.68) | 0.988   | 1.01 (0.67-1.52)  | 0.961   |
| intermediate genotypes         | 0.30 (0.10-0.88) | 0.028   | 1.42 (0.84-2.39)  | 0.187   |
| rs10046 T/T + rs749292 T/T     |                  |         |                   |         |
| Ever smoker                    | 1                |         | 1                 |         |
| No                             | 1.27 (0.73-2.23) | 0.395   | 1.42 (0.94-2.12)  | 0.09    |
| Yes                            |                  |         |                   |         |
| Age at diagnosis               | 1                |         | 1                 |         |
| ≤65                            | 2.34 (1.48-3.69) | <0.001  | 1.18 (0.82-1.69)  | 0.385   |
| >65                            |                  |         |                   |         |
| BMI                            | 1                |         | 1                 |         |
| ≥24                            | 1.03 (0.98-1.08) | 0.218   | 1.04 (1.00-1.07)  | 0.031   |
| <24                            |                  |         |                   |         |
| Previous byphosphonates        | 1                |         | 1                 |         |
| No                             | 2.02 (0.81-5.08) | 0.134   | 1.06 (0.39-2.90)  | 0.909   |
| Yes                            |                  |         |                   |         |
