# Supplementary material for: SNP of Aromatase Predict Long-term Survival and Aromatase Inhibitor Toxicity in Patients with Early Breast Cancer: A Biomarker Analysis of the GIM4 and GIM5 Trials
Source: PubMed Central journal article supplement — Clin Cancer Res. 2023 Oct 27;29(24):5217–26. doi: 10.1158/1078-0432.CCR-23-1568 (PMC10722129; doi:10.1158/1078-0432.ccr-23-1568), 2023-10-27
Supplement: ccr-23-1568_supplementary_table_s14_suppts14.pdf [file ccr-23-1568_supplementary_table_s14_suppts14.pdf]

**Table S14. Multivariable competing risk model for cardiovascular events versus competing events according to rs727479 genotype and patients' baseline characteristics**

|                                                       | <b>Cardiovascular events</b> |                | <b>Competing events</b>  |                |
|-------------------------------------------------------|------------------------------|----------------|--------------------------|----------------|
|                                                       | <b>N=886, events=19</b>      |                | <b>N=886, events=147</b> |                |
| <b>Variable</b>                                       | <b>sHR (95% CIs)</b>         | <b>p value</b> | <b>sHR (95% CIs)</b>     | <b>p value</b> |
| rs727479 genotypes<br>other genotypes<br>rs727479-T/T | 1<br>0.23 (0.05-1.02)        | 0.053          | 1<br>1.16 (0.83-1.62)    | 0.383          |
| Ever smoker<br>No<br>Yes                              | 1<br>2.17 (0.81-5.78)        | 0.123          | 1<br>1.19 (0.80-1.77)    | 0.399          |
| Age at diagnosis<br>≤65<br>>65                        | 1<br>3.55 (1.40-9.00)        | 0.008          | 1<br>1.08 (0.76-1.55)    | 0.652          |
| BMI<br>>30<br>≥30                                     | 1<br>3.47 (0.58-9.74)        | 0.217          | 1<br>1.38 (0.94-2.03)    | 0.102          |
| Baseline CV risk factors<br>No<br>Yes                 | 1<br>0.80 (0.20-3.45)        | 0.731          | 1<br>1.42 (0.92-2.19)    | 0.111          |
