# Supplementary material for: SNP of Aromatase Predict Long-term Survival and Aromatase Inhibitor Toxicity in Patients with Early Breast Cancer: A Biomarker Analysis of the GIM4 and GIM5 Trials
Source: PubMed Central journal article supplement — Clin Cancer Res. 2023 Oct 27;29(24):5217–26. doi: 10.1158/1078-0432.CCR-23-1568 (PMC10722129; doi:10.1158/1078-0432.ccr-23-1568), 2023-10-27
Supplement: ccr-23-1568_supplementary_table_s15_suppts15.pdf [file ccr-23-1568_supplementary_table_s15_suppts15.pdf]

**Table S15. Fine and Gray univariate analyses assessing the association of SNPs combined genotypes with skeletal and cardiovascular events according to different definitions of competing events.**

| <b>Fine-Gray analysis for skeletal events according to different definition of competing events</b> |                                                                                                             |                |                                                                                                                                     |                |
|-----------------------------------------------------------------------------------------------------|-------------------------------------------------------------------------------------------------------------|----------------|-------------------------------------------------------------------------------------------------------------------------------------|----------------|
| <b>rs10046 and rs749292 combined genotypes</b>                                                      | <b>Skeletal events:<br/>bone fractures</b>                                                                  |                | <b>Competing events:<br/>death from any cause<br/>breast cancer recurrence<br/>invasive breast cancer<br/>second primary cancer</b> |                |
|                                                                                                     | <b>N=886, events=79</b>                                                                                     |                | <b>N=886, events=147</b>                                                                                                            |                |
|                                                                                                     | <b>sHR (95% CIs)</b>                                                                                        | <b>p value</b> | <b>sHR (95% CIs)</b>                                                                                                                | <b>p value</b> |
| Double homozygosis in C/C                                                                           | Ref.                                                                                                        | Ref.           | Ref.                                                                                                                                | Ref.           |
| Intermediate genotypes                                                                              | 1.12 (0.67-1.87)                                                                                            | 0.658          | 1.04 (0.69-1.57)                                                                                                                    | 0.850          |
| Double homozygosis in T/T                                                                           | 0.32 (0.11-0.94)                                                                                            | 0.038          | 1.33 (0.79-2.24)                                                                                                                    | 0.279          |
|                                                                                                     | <b>Skeletal events:<br/>bone fractures</b>                                                                  |                | <b>Competing events:<br/>death from any cause</b>                                                                                   |                |
|                                                                                                     | <b>N=886, events=79</b>                                                                                     |                | <b>N=886, events=92</b>                                                                                                             |                |
|                                                                                                     | <b>sHR (95% CIs)</b>                                                                                        | <b>p value</b> | <b>sHR (95% CIs)</b>                                                                                                                | <b>p value</b> |
| Double homozygosis in C/C                                                                           | Ref.                                                                                                        | Ref.           | Ref.                                                                                                                                | Ref.           |
| Intermediate genotypes                                                                              | 1.12 (0.68-1.89)                                                                                            | 0.657          | 1.06 (0.66-1.85)                                                                                                                    | 0.700          |
| Double homozygosis in T/T                                                                           | 0.31 (0.10-0.93)                                                                                            | 0.033          | 1.45 (0.76-2.74)                                                                                                                    | 0.255          |
| <b>Fine-Gray analysis for CV events according to different definition of competing events</b>       |                                                                                                             |                |                                                                                                                                     |                |
| <b>rs727479 genotype</b>                                                                            | <b>Cardiovascular events<br/>venous thrombosis, embolism or stroke,<br/>angina or myocardial infarction</b> |                | <b>Competing events:<br/>death from any cause<br/>breast cancer recurrence<br/>invasive breast cancer<br/>second primary cancer</b> |                |
|                                                                                                     | <b>N=886, events=19</b>                                                                                     |                | <b>N=886, events=147</b>                                                                                                            |                |
|                                                                                                     | <b>sHR (95% CIs)</b>                                                                                        | <b>p value</b> | <b>sHR (95% CIs)</b>                                                                                                                | <b>p value</b> |
| rs727479-G/G or G/T<br>rs727479-T/T                                                                 | Ref.<br>0.23 (0.10-0.98)                                                                                    | Ref.<br>0.048  | Ref.<br>1.17 (0.84-1.63)                                                                                                            | Ref.<br>0.356  |
|                                                                                                     | <b>Cardiovascular events<br/>venous thrombosis, embolism or stroke,<br/>angina or myocardial infarction</b> |                | <b>Competing events:<br/>death from any cause</b>                                                                                   |                |
|                                                                                                     | <b>N=886, events=19</b>                                                                                     |                | <b>N=886, events=92</b>                                                                                                             |                |
|                                                                                                     | <b>sHR (95% CIs)</b>                                                                                        | <b>p value</b> | <b>sHR (95% CIs)</b>                                                                                                                | <b>p value</b> |
| rs727479-G/G or G/T<br>rs727479-T/T                                                                 | Ref.<br>0.22 (0.05-0.98)                                                                                    | Ref.<br>0.047  | Ref.<br>1.44 (0.90-2.28)                                                                                                            | Ref.<br>0.127  |

Abbreviations: CV, cardiovascular.
