# Supplementary material for: SNP of Aromatase Predict Long-term Survival and Aromatase Inhibitor Toxicity in Patients with Early Breast Cancer: A Biomarker Analysis of the GIM4 and GIM5 Trials
Source: PubMed Central journal article supplement — Clin Cancer Res. 2023 Oct 27;29(24):5217–26. doi: 10.1158/1078-0432.CCR-23-1568 (PMC10722129; doi:10.1158/1078-0432.ccr-23-1568), 2023-10-27
Supplement: ccr-23-1568_supplementary_tables_s9_suppts9.pdf [file ccr-23-1568_supplementary_tables_s9_suppts9.pdf]

**Table S9. Univariate Cox proportional hazard model assessing the association between SNPs of aromatase and Disease-free survival in the GIM4 and GIM5 cohorts, and according to treatment arm (short letrozole arm and long letrozole arm) in the GIM4 cohort.**

|                  | <b>GIM4 total</b>   |                | <b>GIM4 short arm</b> |                | <b>GIM4 long arm</b> |                | <b>GIM5</b>         |                |
|------------------|---------------------|----------------|-----------------------|----------------|----------------------|----------------|---------------------|----------------|
|                  | <b>N=591</b>        |                | <b>N=292</b>          |                | <b>N=299</b>         |                | <b>N=295</b>        |                |
|                  | <b>Events=90</b>    |                | <b>Events= 50</b>     |                | <b>Events= 40</b>    |                | <b>Events=69</b>    |                |
|                  | <b>HR (95% CIs)</b> | <b>p value</b> | <b>HR (95% CIs)</b>   | <b>p value</b> | <b>HR (95% CIs)</b>  | <b>p value</b> | <b>HR (95% CIs)</b> | <b>p value</b> |
| <b>rs4646</b>    |                     |                |                       |                |                      |                |                     |                |
| <b>Additive</b>  |                     |                |                       |                |                      |                |                     |                |
| <b>G/T</b>       | 1.16 (0.76-1.78)    | 0.483          | 1.27 (0.72-2.23)      | 0.414          | 1.11 (0.59-2.10)     | 0.744          | 1.08 (0.66-1.77)    | 0.764          |
| <b>T/T</b>       | 0.65 (0.23-1.82)    | 0.417          | 1.01 (0.24-4.30)      | 0.986          | 0.52 (0.12-2.23)     | 0.377          | 1.06 (0.41-2.69)    | 0.911          |
| <b>Dominant</b>  |                     |                |                       |                |                      |                |                     |                |
| <b>G/T+T/T</b>   | 1.64 (0.60-4.49)    | 0.329          | 1.11 (0.27-4.57)      | 0.885          | 2.03 (0.49-4.44)     | 0.329          | 1.08 (0.67-1.72)    | 0.764          |
| <b>Recessive</b> |                     |                |                       |                |                      |                |                     |                |
| <b>T/T</b>       | 0.60 (0.22-1.65)    | 0.329          | 0.90 (0.22-3.71)      | 0.885          | 0.49 (0.12-2.04)     | 0.329          | 1.02 (0.41-2.54)    | 0.964          |
| <b>rs10046</b>   |                     |                |                       |                |                      |                |                     |                |
| <b>Additive</b>  |                     |                |                       |                |                      |                |                     |                |
| <b>C/T</b>       | 1.10 (0.67-1.82)    | 0.702          | 1.07 (0.54-2.12)      | 0.847          | 1.10 (0.53-2.30)     | 0.785          | 1.15 (0.63-2.11)    | 0.650          |
| <b>T/T</b>       | 1.10 (0.60-2.01)    | 0.751          | 1.02 (0.46-2.28)      | 0.957          | 1.11 (0.44-2.79)     | 0.825          | 1.59 (0.81-3.11)    | 0.174          |
| <b>Dominant</b>  |                     |                |                       |                |                      |                |                     |                |
| <b>C/T + T/T</b> | 1.10 (0.69-1.77)    | 0.687          | 1.05 (0.55-2.02)      | 0.873          | 1.10 (0.55-2.23)     | 0.773          | 1.29 (0.73-2.29)    | 0.377          |
| <b>Recessive</b> |                     |                |                       |                |                      |                |                     |                |
| <b>T/T</b>       | 1.03 (0.63-1.70)    | 0.898          | 0.98 (0.51-1.87)      | 0.944          | 1.04 (0.47-2.27)     | 0.925          | 1.49 (0.89-2.52)    | 0.131          |
| <b>rs749292</b>  |                     |                |                       |                |                      |                |                     |                |
| <b>Additive</b>  |                     |                |                       |                |                      |                |                     |                |
| <b>C/T</b>       | 1.13 (0.70-1.82)    | 0.611          | 1.05 (0.56-1.99)      | 0.973          | 1.24 (0.61-2.53)     | 0.547          | 1.15 (0.66-1.99)    | 0.618          |
| <b>T/T</b>       | 1.34 (0.73-2.44)    | 0.348          | 1.46 (0.67-3.14)      | 0.339          | 1.17 (0.44-3.13)     | 0.752          | 1.66 (0.84-3.29)    | 0.148          |
| <b>Dominant</b>  |                     |                |                       |                |                      |                |                     |                |
| <b>C/T + T/T</b> | 1.18 (0.75-1.85)    | 0.466          | 1.16 (0.64-2.10)      | 0.632          | 1.23 (0.62-2.42)     | 0.556          | 1.26 (0.75-2.12)    | 0.383          |
| <b>Recessive</b> |                     |                |                       |                |                      |                |                     |                |
| <b>T/T</b>       | 1.24 (0.73-2.11)    | 0.425          | 1.41 (0.72-2.76)      | 0.313          | 1.03 (0.43-2.45)     | 0.955          | 1.52 (0.84-2.74)    | 0.163          |
| <b>rs727479</b>  |                     |                |                       |                |                      |                |                     |                |
| <b>Additive</b>  |                     |                |                       |                |                      |                |                     |                |
| <b>T/G</b>       | 0.64 (0.32-1.25)    | 0.192          | 0.56 (0.21-1.48)      | 0.243          | 0.79 (0.30-2.04)     | 0.620          | 0.86 (0.43-1.70)    | 0.663          |
| <b>G/G</b>       | 0.81 (0.52-1.26)    | 0.351          | 0.88 (0.49-1.57)      | 0.658          | 0.77 (0.39-1.53)     | 0.460          | 0.99 (0.49-2.02)    | 0.990          |
| <b>Dominant</b>  |                     |                |                       |                |                      |                |                     |                |
| <b>T/G + G/G</b> | 1.39 (0.74-2.62)    | 0.307          | 1.66 (0.66-4.20)      | 0.281          | 1.09 (0.46-2.61)     | 0.842          | 0.91 (0.48-1.74)    | 0.782          |
| <b>Recessive</b> |                     |                |                       |                |                      |                |                     |                |
| <b>G/G</b>       | 1.30 (0.85-1.99)    | 0.220          | 1.25 (0.71-2.20)      | 0.432          | 1.29 (0.68-2.45)     | 0.442          | 1.12 (0.68-1.83)    | 0.657          |
