# Supplementary figures and images for: SNP of Aromatase Predict Long-term Survival and Aromatase Inhibitor Toxicity in Patients with Early Breast Cancer: A Biomarker Analysis of the GIM4 and GIM5 Trials
Source: PubMed Central journal article supplement — Clin Cancer Res. 2023 Oct 27;29(24):5217–26. doi: 10.1158/1078-0432.CCR-23-1568 (PMC10722129; doi:10.1158/1078-0432.ccr-23-1568), 2023-10-27

**Figure S1:** CONSORT diagram of all patients included from the GIM4 and GIM5 trials

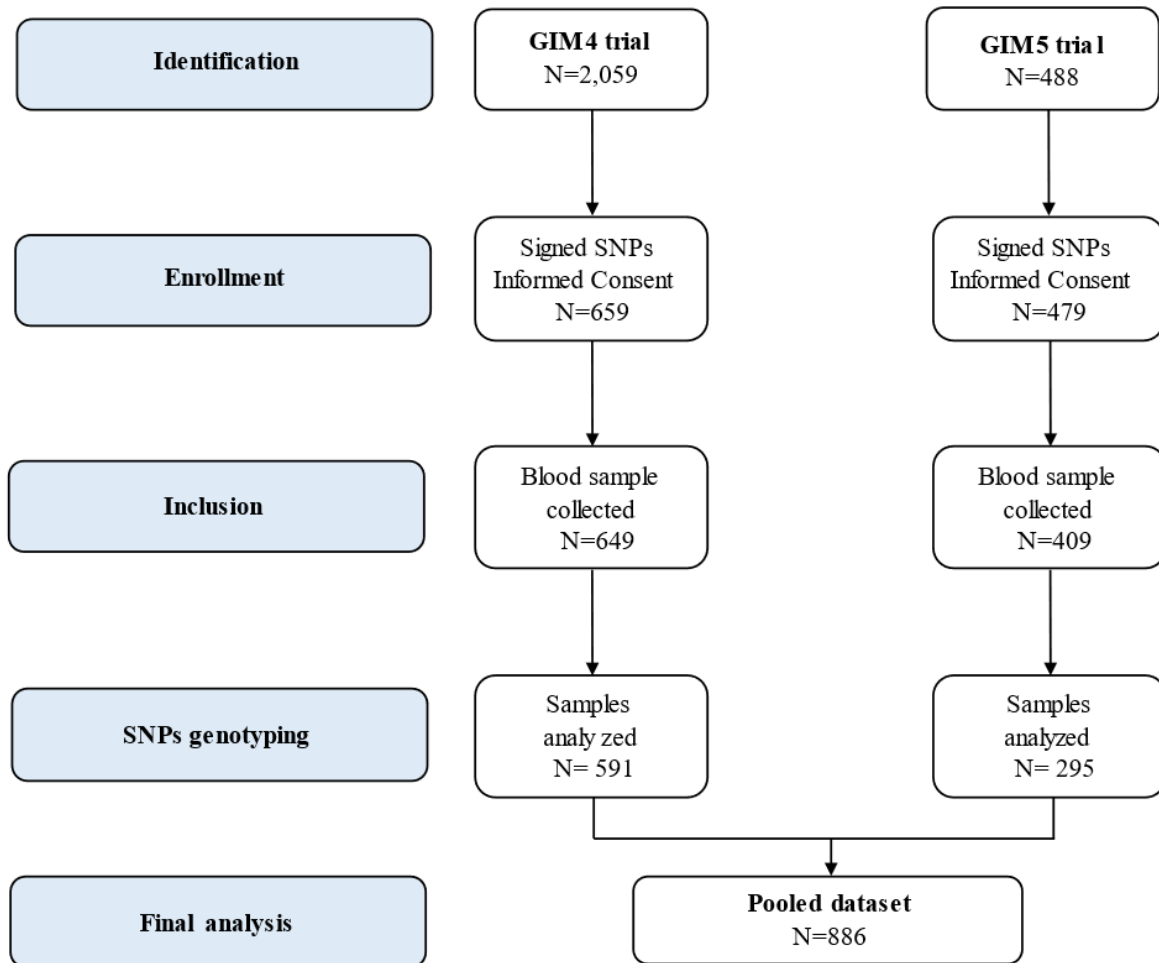

Supplement: ccr-23-1568_supplementary_figure_s1_suppfs1.pdf [file ccr-23-1568_supplementary_figure_s1_suppfs1.pdf]
